# Supplementary material
Source: HighWire-hosted journal article supplement (https://msphere.asm.org/content/2/2/e00120-17)

**A**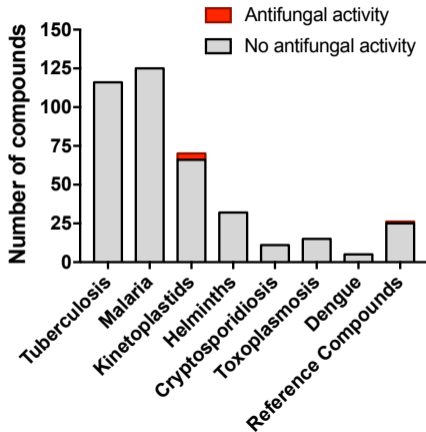**B****Kinetoplastid-targeted compounds**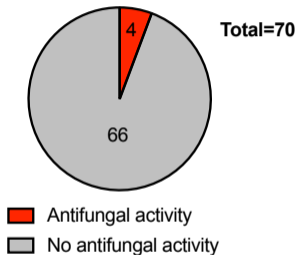

Supplement: inline-supplementary-material-1 [file inline-supplementary-material-1.pdf]
