# Supplementary material
Source: HighWire-hosted journal article supplement (https://msphere.asm.org/content/2/2/e00120-17)

### *C. neoformans*

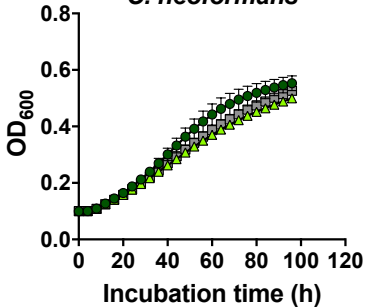

### *C. albicans*

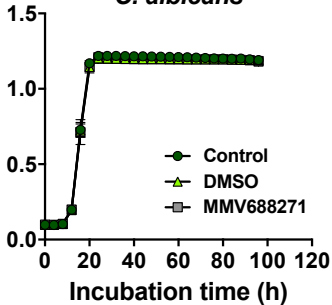

Supplement: inline-supplementary-material-2 [file inline-supplementary-material-2.pdf]
